# Supplementary material for: Wnt/β-catenin–activated Ewing sarcoma cells promote the angiogenic switch
Source: JCI journal article supplement (doi:10.1172/jci.insight.135188), 2020-06-16
Supplement: sd2 [file 2]

**A**

All Wnt-regulated Genes

| <u>Motif Name</u>                            | <u>Consensus</u> | <u>P-value</u> |
|----------------------------------------------|------------------|----------------|
| E2F4(E2F)/K562-E2F4-ChIP-Seq(GSE31477)/Homer | GGCGGGAAAH       | 1.00E-07       |
| E2F(E2F)/Hela-CellCycle-Expression/Homer     | TTSGCGGAAAA      | 1.00E-06       |
| Sp1(Zf)/Promoter/Homer                       | GGCCCCGCCCC      | 1.00E-03       |
| KLF5(Zf)/LoVo-KLF5-ChIP-Seq(GSE49402)/Homer  | DGGGYGKGGC       | 1.00E-03       |
| KLF3(Zf)/MEF-Klf3-ChIP-Seq(GSE44748)/Homer   | NRGCCCRCCCHBNN   | 1.00E-03       |

  

**B**

Overlap Angiogenic Switch and Wnt-regulated Genes

| <u>Motif Name</u>                                       | <u>Consensus</u> | <u>P-value</u> |
|---------------------------------------------------------|------------------|----------------|
| JunB(bZIP)/DendriticCells-Junb-ChIP-Seq(GSE36099)/Homer | RATGASTCAT       | 1.00E-02       |
| HNF6(Homeobox)/Liver-Hnf6-ChIP-Seq(ERP000394)/Homer     | NTATYGATCH       | 1.00E-02       |
| Atf3(bZIP)/GBM-ATF3-ChIP-Seq(GSE33912)/Homer            | DATGASTCATHN     | 1.00E-02       |
| Cux2(Homeobox)/Liver-Cux2-ChIP-Seq(GSE35985)/Homer      | HNRAATCAAT       | 1.00E-02       |
| Mef2b(MADS)/HEK293-Mef2b.V5-ChIP-Seq(GSE67450)/Homer    | GCTATTTTGGM      | 1.00E-02       |

**Supplemental Table 1.** (A) Motif analysis of all Wnt-regulated genes, as identified by RNA-sequencing of CHLA25 cells in the presence or absence of Wnt3a conditioned media. (B) Motif analysis of angiogenic switch genes that were identified among Wnt-regulated genes. Motif analysis was performed using HOMER, and transcription binding sites were searched within promoter regions +/- 2 kb from the transcription start site of each gene. Top 5 motifs for each gene set are shown, along with their consensus sequence and p-value.
